# Supplementary material for: Gene Therapy with Voretigene Neparvovec Improves Vision and Partially Restores Electrophysiological Function in Pre-School Children with Leber Congenital Amaurosis
Source: MDPI journal article supplement (doi:10.3390/biomedicines11010103), 2022-12-30
Supplement: s1 [file s1]

**Table S1.** Overview of performed examinations and timeline showing available data for each timepoint after gene therapy.

| Timeline (months after surgery) |                |     |                                | 1    | 2 | 3    | 4 | 6    | 8    | 12   | 14   | 15   | 20     | 21     | 22     | 23      | 30      | 32      |
|---------------------------------|----------------|-----|--------------------------------|------|---|------|---|------|------|------|------|------|--------|--------|--------|---------|---------|---------|
| Patient                         | Examination    | Eye | Baseline / before gene therapy |      |   |      |   |      |      |      |      |      |        |        |        |         |         |         |
| P1                              | BCVA (LogMAR)* | OD  | 1.0                            | 0.8  |   | 0.8  |   | 1.0  |      | 0.6  |      | x    |        | 0.5    |        | x       | 0.5     | x       |
|                                 |                | OS  | 1.3                            | 1.1  |   | 0.8  |   | 0.9  |      | x    |      | 0.7  |        | x      |        | 0.6     | x       | 0.6     |
|                                 | BCVA (LogMAR)* | OD  | BCVA change to baseline        | -0.2 |   | -0.2 |   | 0    |      | -0.4 |      | x    |        | -0.5   |        | x       | -0.5    | x       |
|                                 |                | OS  |                                | -0.2 |   | -0.5 |   | -0.4 |      | x    |      | -0.6 |        | x      |        | -0.7    | x       | -0.7    |
|                                 | ERG (30Hz)     | OD  | ✓                              | -    |   | -    |   | -    |      | -    |      | -    |        | ✓      |        | x       | ✓       | x       |
|                                 |                | OS  | ✓                              |      |   |      |   |      |      |      |      |      |        | x      |        | ✓       | x       | ✓       |
|                                 | FST (dB)       | OD  | n.a. **                        | -    |   | -    |   | -    |      | -    |      | -    |        | -      |        | -       | n.a. ♦♦ | n.a. ♦♦ |
|                                 |                | OS  |                                |      |   |      |   |      |      |      |      |      |        |        |        | n.a. ♦♦ | n.a. ♦♦ |         |
|                                 | Visual Field   |     | n.a. **                        | -    |   | -    |   | -    |      | -    |      | -    |        | ✓ (OD) |        | ✓ (OS)  | -       | -       |
|                                 |                |     |                                |      |   |      |   |      |      |      |      |      |        |        |        |         |         |         |
| OCT                             | OD             | ✓   | ✓                              |      | ✓ |      | ✓ |      | ✓    |      | x    |      | ✓      |        | x      | ✓       | x       |         |
|                                 | OS             | ✓   | ✓                              |      | ✓ |      | ✓ |      | x    |      | ✓    |      | x      |        | ✓      | x       | ✓       |         |
| Autofluorescence                | OD             | ✓   | ✓                              |      | ✓ |      | ✓ |      | ✓    |      | x    |      | ✓      |        | x      | ✓       | x       |         |
|                                 | OS             | ✓   | ✓                              |      | ✓ |      | ✓ |      | x    |      | ✓    |      | x      |        | ✓      | x       | ✓       |         |
| Wide-angle fundus imaging       | OD             | ✓   | ✓                              |      | ✓ |      | ✓ |      | ✓    |      | x    |      | ✓      |        | x      | ✓       | x       |         |
|                                 | OS             | ✓   | ✓                              |      | ✓ |      | ✓ |      | x    |      | ✓    |      | x      |        | ✓      | x       | ✓       |         |
| Timeline (months after surgery) |                |     |                                | 1    | 2 | 3    | 4 | 6    | 8    | 12   | 14   | 15   | 20     | 21     | 22     | 23      | 25      | 27      |
| P2                              | BCVA (LogMAR)* | OD  | 1.1 (OU near)                  | 0.8  |   | 0.6  |   | 0.6  |      | 0.9  | 0.7  |      | x      |        | 0.9    |         | x       | 0.9     |
|                                 |                | OS  |                                | 0.7  |   | 0.7  |   | 0.7  | x    |      | 0.7  |      | x      |        | 0.5    | x       |         |         |
|                                 | BCVA (LogMAR)* | OD  | BCVA change to baseline        | -0.3 |   | -0.5 |   | -0.5 |      | -0.2 | -0.4 |      | x      |        | -0.2   |         | x       | -0.2    |
| OS                              | -0.4           |     |                                | -0.4 |   | -0.4 | x |      | -0.4 |      | x    |      | -0.6   | x      |        |         |         |         |
|                                 | ERG (30Hz)     | OD  | n.a. **                        | -    |   | -    |   | ✓    |      | -    | -    |      | n.a. ♦ |        | n.a. ♦ |         | n.a. ♦  | n.a. ♦  |

|                                 |                  |         |                         |      |      |      |           |         |        |        |   |   |         |   |         |   |         |         |
|---------------------------------|------------------|---------|-------------------------|------|------|------|-----------|---------|--------|--------|---|---|---------|---|---------|---|---------|---------|
|                                 |                  | OS      |                         |      |      |      |           | ✓       |        |        |   |   | n.a. ♦  |   | n.a. ♦  |   | n.a. ♦  | n.a. ♦  |
|                                 | FST (dB)         | OU      | n.a. **                 | -    |      | -    |           | n.a. ** |        | -      | - |   | n.a. ** |   | n.a. ** |   | n.a. ** | n.a. ** |
|                                 | Visual Field     |         | n.a. **                 | -    |      | -    |           | n.a. ** |        | -      | - |   | n.a. ** |   | n.a. ** |   | n.a. ** | n.a. ** |
|                                 | OCT              | OD      | OD                      | ✓    |      | ✓    |           | ✓       |        | ✓      | ✓ |   | x       |   | ✓       |   | x       | ✓       |
|                                 |                  | OS      | OS                      | ✓    |      | ✓    |           | ✓       |        | ✓      | x |   | ✓       |   | x       |   | ✓       | x       |
|                                 | Autofluorescence | OD      | ✓                       | ✓    |      | ✓    |           | ✓       |        | ✓      | ✓ |   | x       |   | ✓       |   | x       | ✓       |
|                                 |                  | OS      | ✓                       | ✓    |      | ✓    |           | ✓       |        | ✓      | x |   | ✓       |   | x       |   | ✓       | x       |
| Wide-angle fundus imaging       | OD               | ✓       | ✓                       |      | ✓    |      | ✓         |         | ✓      | ✓      |   | x |         | ✓ |         | x | ✓       |         |
|                                 | OS               | ✓       | ✓                       |      | ✓    |      | ✓         |         | ✓      | x      |   | ✓ |         | x |         | ✓ | x       |         |
| Timeline (months after surgery) |                  |         |                         | 1    | 2    | 3    | 4         | 6       | 8      | 12     |   |   |         |   |         |   |         |         |
| P3                              | BCVA (LogMAR)*   | OD      | 1.2                     | 1.3  |      | 1.3  |           | 0.8     |        | 1.2    |   |   |         |   |         |   |         |         |
|                                 |                  | OS      | 1.2                     | 1.2  |      | x    |           | 1.0     |        | x      |   |   |         |   |         |   |         |         |
|                                 | BCVA (LogMAR)*   | OD      | BCVA change to baseline | 0.1  |      | 0.1  |           | -0.4    |        | 0      |   |   |         |   |         |   |         |         |
|                                 |                  | OS      |                         | 0    |      | x    |           | -0.2    |        | x      |   |   |         |   |         |   |         |         |
|                                 | ERG (30Hz)       | OD      | ✓                       | -    | -    | -    | -         | x       | -      |        |   |   |         |   |         |   |         |         |
|                                 |                  | OS      | ✓                       |      |      |      |           | ✓       |        |        |   |   |         |   |         |   |         |         |
|                                 | FST (dB)         | OD      | n.a. **                 | -    | -    | -    | -         | x       | -37.41 | -58.20 |   |   |         |   |         |   |         |         |
|                                 |                  | OS      |                         |      |      |      |           | -32.12  | x      | x      |   |   |         |   |         |   |         |         |
| Visual Field                    |                  | n.a. ** | -                       | -    | -    | -    | ✓<br>(OD) |         |        |        |   |   |         |   |         |   |         |         |
| OCT                             | OD               | ✓       | ✓                       |      | ✓    |      | ✓         |         | ✓      |        |   |   |         |   |         |   |         |         |
|                                 | OS               | ✓       | ✓                       |      | x    |      | ✓         |         | x      |        |   |   |         |   |         |   |         |         |
| Autofluorescence                | OD               | ✓       | ✓                       |      | ✓    |      | ✓         |         | ✓      |        |   |   |         |   |         |   |         |         |
|                                 | OS               | ✓       | ✓                       |      | x    |      | ✓         |         | x      |        |   |   |         |   |         |   |         |         |
| Wide-angle fundus imaging       | OD               | ✓       | ✓                       |      | ✓    |      | ✓         |         | ✓      |        |   |   |         |   |         |   |         |         |
|                                 | OS               | ✓       | ✓                       |      | x    |      | ✓         |         | x      |        |   |   |         |   |         |   |         |         |
| Timeline (months after surgery) |                  |         |                         | 1    | 2    | 3    | 4         | 6       | 8      |        |   |   |         |   |         |   |         |         |
| P4                              | BCVA (LogMAR)*   | OD      | 0.5                     | 0.4  | 0.4  | 0.3  | 0.5       | 0.2     | x      |        |   |   |         |   |         |   |         |         |
|                                 |                  | OS      | 0.7                     | 0.5  | x    | 0.5  | x         | 0.4     | 0      |        |   |   |         |   |         |   |         |         |
|                                 | BCVA (LogMAR)*   | OD      | BCVA change to baseline | -0.1 | -0.1 | -0.2 | 0         | -0.3    | x      |        |   |   |         |   |         |   |         |         |
|                                 |                  | OS      |                         | -0.2 | x    | -0.2 | x         | -0.3    | -0.7   |        |   |   |         |   |         |   |         |         |

|  |                           |    |        |   |   |   |   |        |        |
|--|---------------------------|----|--------|---|---|---|---|--------|--------|
|  | ERG (30Hz)                | OD | ✓      | - | - | - | - | n.a. ♦ | -      |
|  |                           | OS | ✓      |   |   |   |   | n.a. ♦ |        |
|  | FST (dB)                  | OD | -09.55 | - | - | - | - | -38.05 | -      |
|  |                           | OS | -10.76 |   |   |   |   | -66.25 |        |
|  | Visual Field              |    | ✓ (OU) | - | - | - | - | ✓ (OD) | ✓ (OS) |
|  | OCT                       | OD | ✓      | ✓ | ✓ | ✓ | ✓ | ✓      | x      |
|  |                           | OS | ✓      | ✓ | x | ✓ | x | ✓      | ✓      |
|  | Autofluorescence          | OD | ✓      | ✓ | ✓ | ✓ | ✓ | ✓      | x      |
|  |                           | OS | ✓      | ✓ | x | ✓ | x | ✓      | ✓      |
|  | Wide-angle fundus imaging | OD | ✓      | ✓ | ✓ | ✓ | ✓ | ✓      | x      |
|  |                           | OS | ✓      | ✓ | x | ✓ | x | ✓      | ✓      |

\* visual acuity was assessed in decimal and converted in LogMAR. In P1, visual acuity before treatment was assessed using LEA symbols and in the postoperative course using Landolt C rings (single optotypes); in P2, LEA symbols were used during the entire observation period; P3 was assessed using an ETDRS number chart and assessment of P4 was performed using Landolt C rings (single optotypes) during the entire observation period

\*\* due to demanding set-up, visual impairment, and young age no measurements could be obtained

✓ examination was performed

♦ examination could not be carried out due to non-compliance (patient refused exam)

♦♦ poor data quality, no valid values could be recorded due to reduced compliance of the patient

x due to the interval between each surgery, values for both eyes are not always available for each time point (x = missing data)

- " = examination was not performed because it was not scheduled as part of the routine check-up
