# Supplementary material for: Gene Therapy with Voretigene Neparvovec Improves Vision and Partially Restores Electrophysiological Function in Pre-School Children with Leber Congenital Amaurosis
Source: Biomedicines. 2022 Dec 30;11(1):103. doi: 10.3390/biomedicines11010103 (PMC9855623; doi:10.3390/biomedicines11010103)
Supplement: Supplementary file 1 [file biomedicines-11-00103-s001.zip]

Archive with 10 entries (10 files):
- Suppl. Figure S1. 30Hz Flicker-ERG of patient 2 after gene therapy with voretigene neparvovec.pdf
- Suppl. Figure S2. Goldmann visual fields of patient 1 and patient 3 after gene therapy.pdf
- Suppl. Figure S3A. VFQ25 visualization_Part2 individual responses.pdf
- Suppl. Figure S3B. VFQ25 visualization_Part3 individual responses.pdf
- Suppl. Table S1. Overview of performed examinations and timeline showing available data for each timepoint after gene therapy.pdf
- __MACOSX/._Suppl. Figure 1. 30Hz Flicker-ERG of patient 2 after gene therapy with voretigene neparvovec.pdf
- __MACOSX/._Suppl. Figure 2. Goldmann visual fields of patient 1 and patient 3 after gene therapy.pdf
- __MACOSX/._Suppl. Figure 3A. VFQ25 visualization_Part2 individual responses.pdf
- __MACOSX/._Suppl. Figure 3B. VFQ25 visualization_Part3 individual responses.pdf
- __MACOSX/._Suppl. Table S1. Overview of performed examinations and timeline showing available data for each timepoint after gene therapy.pdf
